# Supplementary material for: Regenerated and reformed gold and titanium dioxide quantum dots from waste for sustainable and efficient environmental monitoring
Source: Royal Society of Chemistry journal article supplement (doi:10.1039/d4nr04726e), 2025-01-01
Supplement: d4nr04726e1.pdf [file d4nr04726e1.pdf]

**Supporting Information:**

**Regenerated and Reformed Gold and Titanium  
Dioxide Quantum Dots from Waste for  
Sustainable and Efficient Environmental  
Monitoring**

Zain Ul Abideen,\* Rasoul Khayyam Nekouei, Mohsen Hajian-Foroushani,  
Samane Maroufi, Farshid Pahlevani, and Veena Sahajwalla

*Centre for Sustainable Materials Research and Technology, SMaRT@UNSW, School of  
Materials Science and Engineering, UNSW Sydney, NSW 2052, Australia*

E-mail: [zain.abideen@unsw.edu.au](mailto:zain.abideen@unsw.edu.au)

Table S1: Elemental composition of commercial and recycled TiO<sub>2</sub> materials determined by XRF and ICP-OES.

| Element          | Technique | Sample                             | Content (wt%) |
|------------------|-----------|------------------------------------|---------------|
| TiO <sub>2</sub> | XRF       | Commercial TiO <sub>2</sub>        | 98.44         |
| TiO <sub>2</sub> | XRF       | Recycled R-Au-TiO <sub>2</sub> QDs | 83.32         |
| Ti               | ICP-OES   | Recycled R-Au-TiO <sub>2</sub> QDs | 0.553         |
| Ti               | ICP-OES   | Commercial TiO <sub>2</sub>        | 0.035         |
| Au               | ICP-OES   | Recycled R-Au-TiO <sub>2</sub> QDs | 0.239         |

Note: TiO<sub>2</sub> values from XRF represent oxide form; Ti values from ICP-OES represent elemental form. Au was detected only in the recycled sample. All values are based on independently prepared samples and rounded to three decimal places.

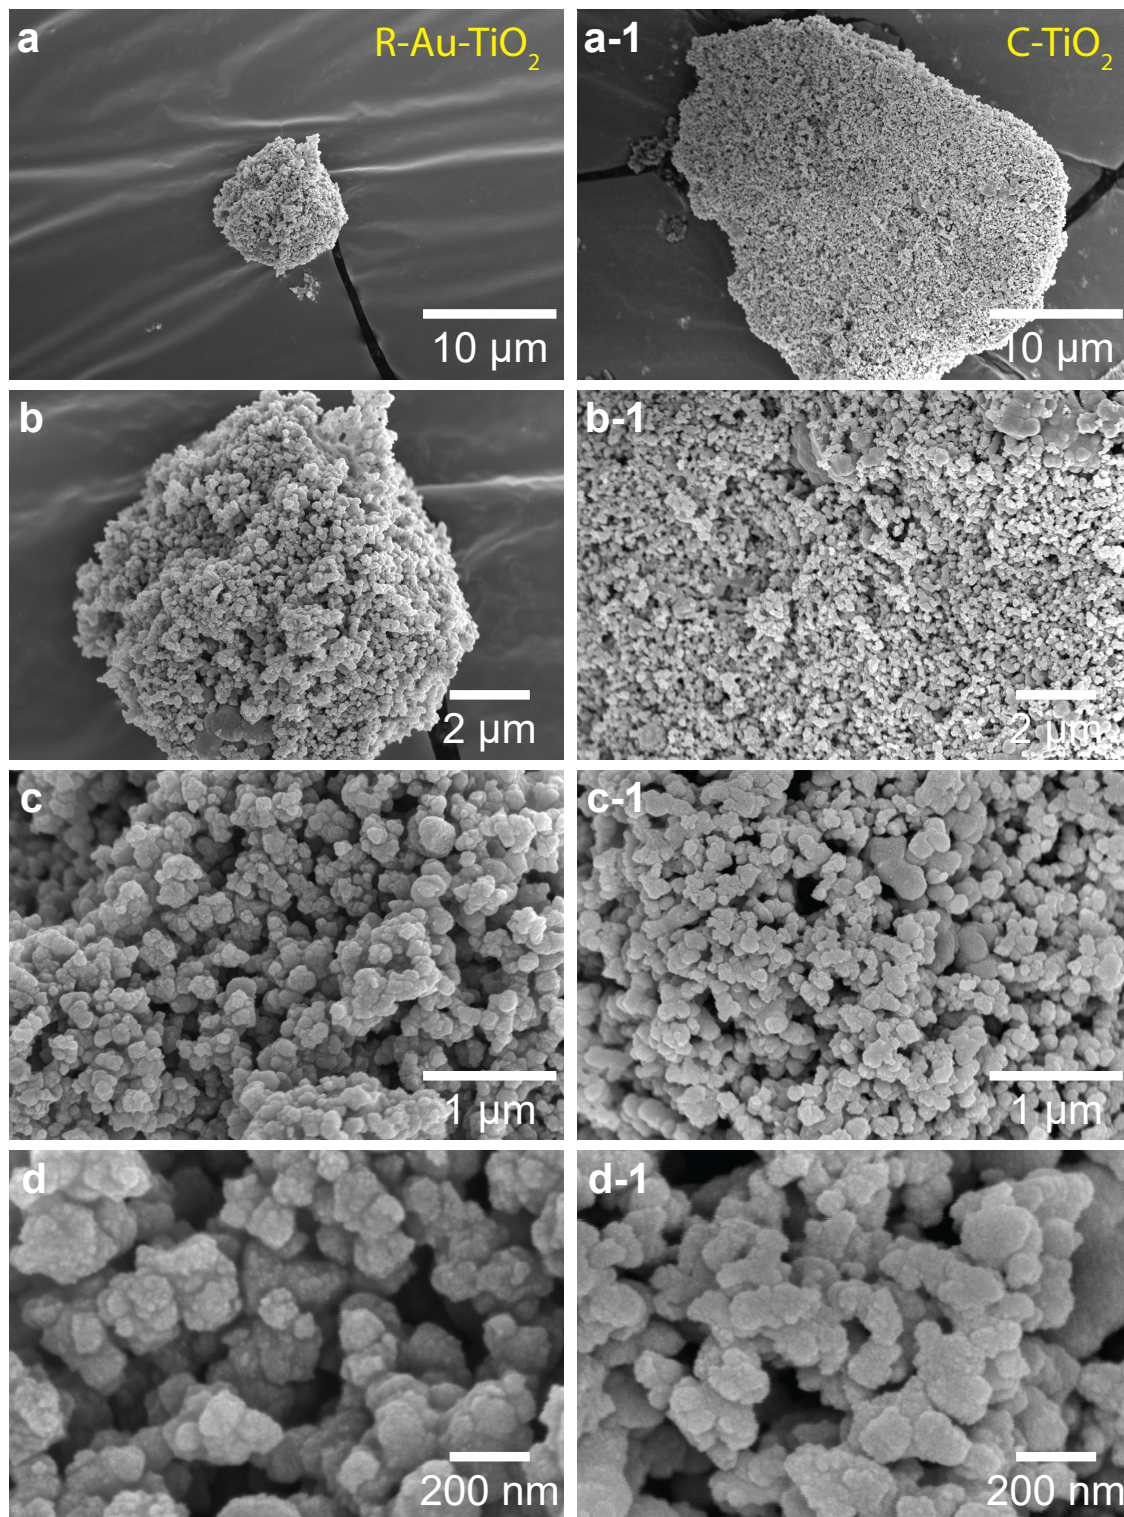

Figure S1: SEM images at different magnifications comparing reformed Au-TiO<sub>2</sub> (R-Au-TiO<sub>2</sub>) hybrid quantum dots (QDs) from waste and commercial TiO<sub>2</sub> nanoparticles (C-TiO<sub>2</sub>). (a) and (a-1) show overall structures at 10  $\mu\text{m}$  scale. (b) and (b-1) provide closer views at 2  $\mu\text{m}$  scale. (c) and (c-1) further zoom in at 1  $\mu\text{m}$  scale. (d) and (d-1) reveal nanoscale features at 200 nm scale, highlighting the similar agglomerated morphology and detailed structural characteristics of both samples.



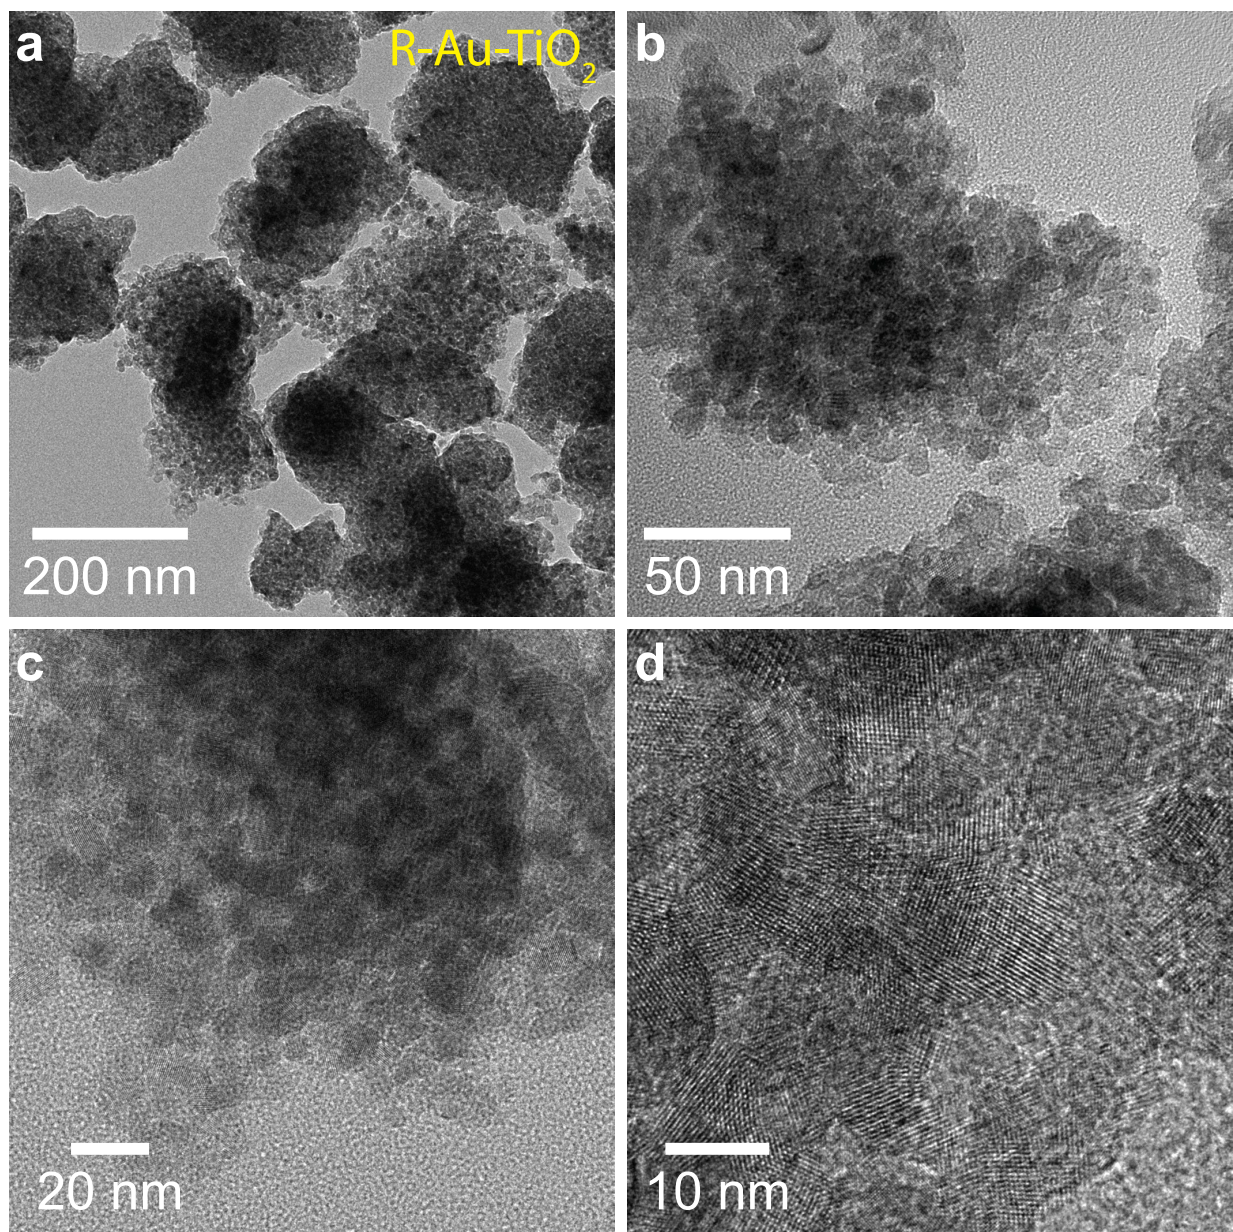

Figure S2: TEM images of R-Au-TiO<sub>2</sub> QDs at varying magnifications. (a) shows the overall morphology at 200 nm scale (b) provides a closer view at 50 nm scale (c) further zooms in at 20 nm scale, and (d) reveals lattice fringes at the nanoscale (10 nm), highlighting the well-dispersed and uniform size distribution, along with the high crystallinity of the R-Au-TiO<sub>2</sub> QDs.



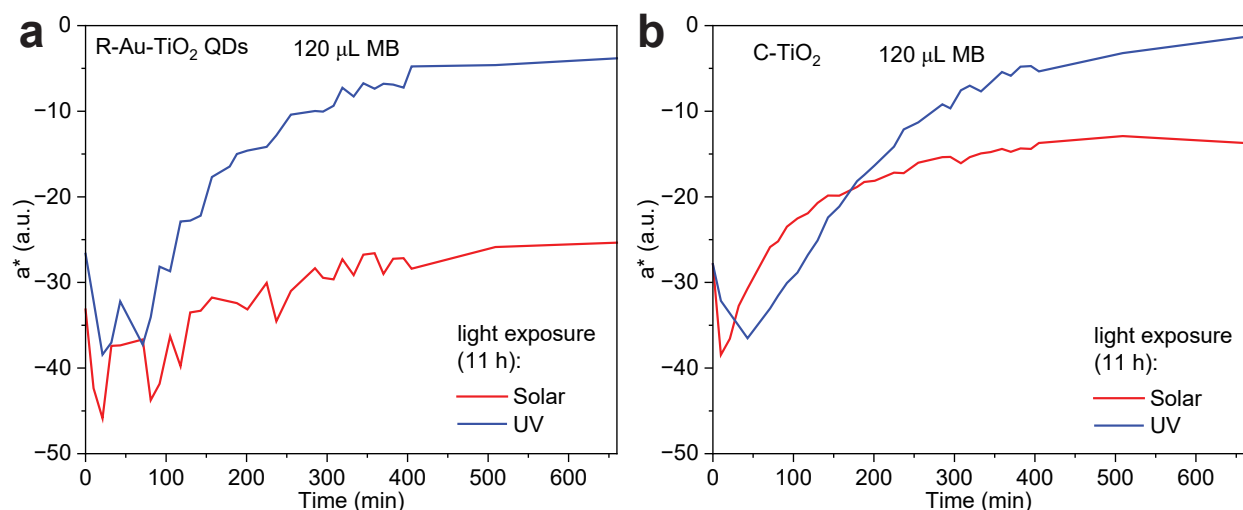

Figure S3: The  $a^*$  component of the CIELAB colour system for (a) R-Au-TiO<sub>2</sub> QDs and (b) C-TiO<sub>2</sub> nanoparticles as a function of time during 11 hours of exposure to the solar simulator and UV light at 254 nm. The plots illustrate the colourimetric changes in the sensors, with initial  $a^*$  values indicating a greenish tint due to the presence of methylene blue (MB). As MB degrades over time, the  $a^*$  values increase, reflecting a shift towards the red spectrum. This change is more pronounced in R-Au-TiO<sub>2</sub> QDs under UV light, indicating more efficient degradation of MB compared to C-TiO<sub>2</sub>.

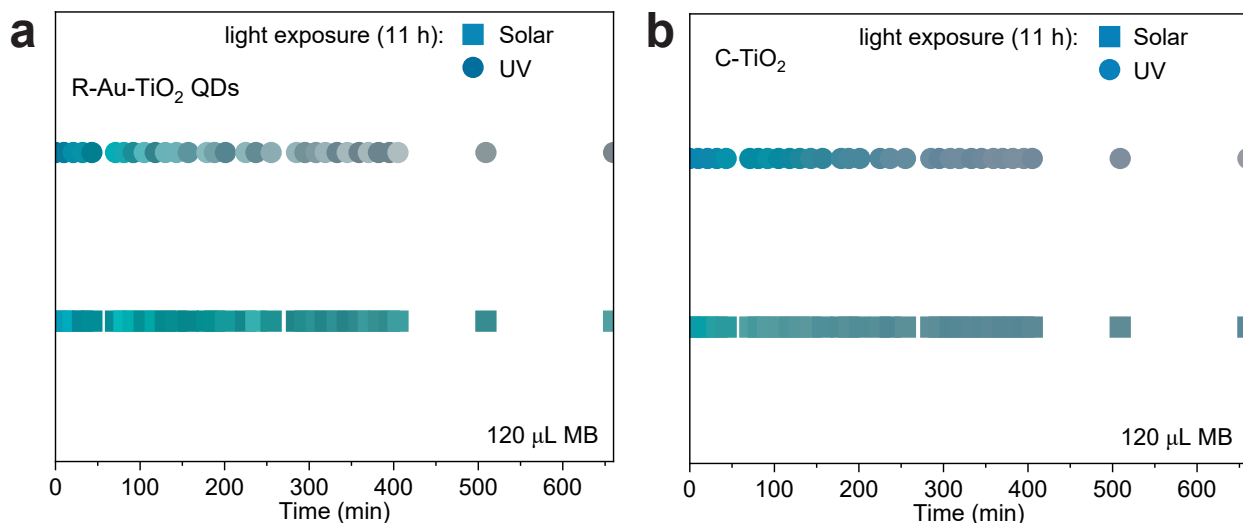

Figure S4: Visual representation of the colour changes in (a) R-Au-TiO<sub>2</sub> QDs and (b) C-TiO<sub>2</sub> nanoparticles films during 11 hours of exposure to solar simulator and UV light at 254 nm. The colour transitions from blue-green to yellow indicate the degradation of MB over time, with more pronounced changes observed under UV light for R-Au-TiO<sub>2</sub> QDs, reflecting their superior photocatalytic performance compared to C-TiO<sub>2</sub>.

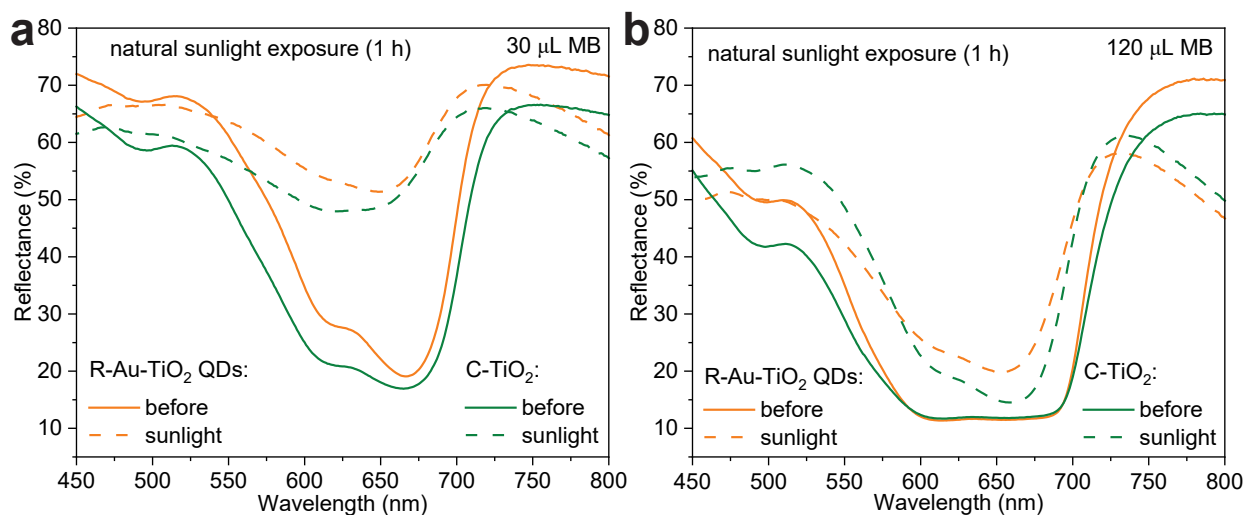

Figure S5: Reflectance spectra of R-Au-TiO<sub>2</sub> QDs and C-TiO<sub>2</sub> nanoparticles before and after 1 hour of natural sunlight exposure for films containing (a) 30 μL and (b) 120 μL of MB. The solid lines represent the spectra before exposure, while the dashed lines represent the spectra after sunlight exposure. The results show a significant decrease in MB absorption in both samples after exposure, indicated by the reduced absorption peak around 650-700 nm, with R-Au-TiO<sub>2</sub> QDs demonstrating a more pronounced change, reflecting their superior photocatalytic performance under natural sunlight conditions.



Table S2: Overview of various TiO<sub>2</sub>-based materials used for photocatalytic degradation of MB under different light sources. The R-Au-TiO<sub>2</sub> QDs, derived from waste and used in this study, demonstrate comparable or superior photocatalytic performance under UV (254 nm), solar simulator, and natural sunlight conditions, with particle sizes less than 10 nm. This performance is benchmarked against a variety of commercial and synthesized TiO<sub>2</sub> materials from the literature.

| TiO <sub>2</sub> preparation                                                  | TiO <sub>2</sub> source                  | Substrate                | Methylene blue concentrations    | Film thickness | Film deposition method | Light source                              | Particle size                           | Key performance indicator                | Ref.      |
|-------------------------------------------------------------------------------|------------------------------------------|--------------------------|----------------------------------|----------------|------------------------|-------------------------------------------|-----------------------------------------|------------------------------------------|-----------|
| R-Au-TiO <sub>2</sub> QDs                                                     | metallurgical waste                      | Glass and aluminium foil | 30 $\mu$ L and 120 $\mu$ L       | 200 $\mu$ m    | Doctor blade           | UV, solar simulator, and natural sunlight | < 10 nm                                 | Rate constant: 0.029 min <sup>-1</sup>   | This work |
| Commercial TiO <sub>2</sub>                                                   | Commercial TiO <sub>2</sub>              | -                        | 1000 ppm                         | -              | -                      | UV                                        | 120-180 nm                              | Rate constant: 0.1192 min <sup>-1</sup>  | S1        |
| Hydrothermal                                                                  | TiCl <sub>4</sub>                        | -                        | 10 mg L <sup>-1</sup>            | -              | -                      | UV (365 nm, 6W)                           | 4.5 nm                                  | Rate constant: 0.018 min <sup>-1</sup>   | S2        |
| Cu-doped TiO <sub>2</sub> (sputtering)                                        | Pure Ti source                           | glass                    | 30 mg L <sup>-1</sup>            | 200 nm         | DC sputtering          | UV                                        | -                                       | -                                        | S3        |
| TiO <sub>2</sub> /Au                                                          | Commercial TiO <sub>2</sub> nanoparticle | -                        | 0.1 mg mL <sup>-1</sup>          | -              | -                      | Chemical degradation                      | Au (10 nm), TiO <sub>2</sub> (21 nm)    | Degradation rate: 79-87%                 | S4        |
| Sol-gel (Fe <sub>2</sub> TiO <sub>5</sub> )                                   | Commercial precursors                    | -                        | 1000 mg L <sup>-1</sup>          | -              | -                      | Natural sunlight                          | 49.7 nm                                 | Rate constant: 0.015 min <sup>-1</sup>   | S5        |
| Sol-gel (TiO <sub>2</sub> , Au-TiO <sub>2</sub> )                             | Commercial precursors                    | quartz glass             | 1.16 x 10 <sup>-5</sup> M        | 200-250 nm     | Dip coating            | UV                                        | Au (13 nm), TiO <sub>2</sub> (25-29 nm) | -                                        | S6        |
| Commercial TiO <sub>2</sub>                                                   | Commercial P25 TiO <sub>2</sub>          | -                        | 500 ppm                          | -              | -                      | UV                                        | 25 nm                                   | -                                        | S7        |
| Commercial TiO <sub>2</sub>                                                   | Commercial TiO <sub>2</sub>              | -                        | 5, 10, 15, 20 mg L <sup>-1</sup> | -              | -                      | UV (364 nm)                               | 10-200 nm                               | Degradation efficiency: 90%              | S8        |
| Commercial TiO <sub>2</sub>                                                   | Commercial TiO <sub>2</sub>              | -                        | 10 ppm                           | -              | -                      | UV                                        | 25 nm                                   | Rate constant: 0.055 min <sup>-1</sup>   | S9        |
| solvent-thermal method (TiO <sub>2</sub> -PRGO)                               | Commercial precursors                    | -                        | 10 mg L <sup>-1</sup>            | -              | -                      | Solar simulator                           | 9.85-11.7 nm                            | Rate constant: 0.0275 min <sup>-1</sup>  | S10       |
| Commercial TiO <sub>2</sub>                                                   | Commercial TiO <sub>2</sub>              | soda lime glass          | 10 mg L <sup>-1</sup>            | 6 $\mu$ m      | Doctor blade method    | UV                                        | 25 nm                                   | Rate constant: 0.15 min <sup>-1</sup>    | S11       |
| Sol-gel (TiO <sub>2</sub> /graphene oxide)                                    | Commercial precursors                    | -                        | 5-25 mg L <sup>-1</sup>          | -              | -                      | UV                                        | -                                       | -                                        | S12       |
| Sol-gel (TiO <sub>2</sub> )                                                   | Commercial precursors                    | glass substrate          | 1 x 10 <sup>-6</sup> M           | 220 nm         | Spin coating           | Visible light                             | 54-67 nm                                | Degradation efficiency: 92%              | S13       |
| Physical vapor deposition (TiO <sub>2</sub> /Nd <sub>2</sub> O <sub>3</sub> ) | Commercial precursors                    | Si (100)                 | 5 and 20 mg L <sup>-1</sup>      | 100 nm         | EB-PVD                 | UV                                        | -                                       | Degradation rate: 72.9%                  | S14       |
| Hydrothermal (TiO <sub>2</sub> )                                              | Commercial precursors                    | FTO coated glass         | 5 ppm                            | -              | -                      | Solar simulator (300-600 nm)              | -                                       | Rate constant: 0.00183 min <sup>-1</sup> | S15       |

## References

- (S1) Abdellah, M.; Nosier, S.; El-Shazly, A.; Mubarak, A. Photocatalytic decolorization of methylene blue using TiO<sub>2</sub>/UV system enhanced by air sparging. *Alexandria Engineering Journal* **2018**, *57*, 3727–3735.
- (S2) Azeez, F.; Al-Hetlani, E.; Arafa, M.; Abdelmonem, Y.; Nazeer, A. A.; Amin, M. O.; Madkour, M. The effect of surface charge on photocatalytic degradation of methylene blue dye using chargeable titania nanoparticles. *Scientific Reports* **2018**, *8*, 7104.
- (S3) Carvalho, H. W.; Batista, A. P.; Hammer, P.; Ramalho, T. C. Photocatalytic degradation of methylene blue by TiO<sub>2</sub>-Cu thin films: Theoretical and experimental study. *Journal of Hazardous Materials* **2010**, *184*, 273–280.
- (S4) Jinga, L. I.; Popescu-Pelin, G.; Socol, G.; Mocanu, S.; Tudose, M.; Culita, D. C.; Kuncser, A.; Ionita, P. Chemical Degradation of Methylene Blue Dye Using TiO<sub>2</sub>/Au Nanoparticles. *Nanomaterials* **2021**, *11*, 1605.
- (S5) Vasiljevic, Z. Z.; Dojcinovic, M. P.; Vujancevic, J. D.; Jankovic-Castvan, I.; Ognjanovic, M.; Tadic, N. B.; Stojadinovic, S.; Brankovic, G. O.; Nikolic, M. V. Photocatalytic degradation of methylene blue under natural sunlight using iron titanate nanoparticles prepared by a modified sol-gel method. *Royal Society Open Science* **2020**, *7*, 200708.
- (S6) Yogi, C.; Kojima, K.; Wada, N.; Tokumoto, H.; Takai, T.; Mizoguchi, T.; Tamiaki, H. Photocatalytic degradation of methylene blue by TiO<sub>2</sub> film and Au particles-TiO<sub>2</sub> composite film. *Thin Solid Films* **2008**, *516*, 5881–5884.
- (S7) Xu, C.; Rangaiah, G. P.; Zhao, X. S. Photocatalytic Degradation of Methylene Blue by Titanium Dioxide: Experimental and Modeling Study. *Industrial & Engineering Chemistry Research* **2014**, *53*, 14641–14649.



- (S8) Dariani, R.; Esmaeili, A.; Mortezaali, A.; Dehghanpour, S. Photocatalytic reaction and degradation of methylene blue on TiO<sub>2</sub> nano-sized particles. *Optik* **2016**, *127*, 7143–7154.
- (S9) Tichapondwa, S.; Newman, J.; Kubheka, O. Effect of TiO<sub>2</sub> phase on the photocatalytic degradation of methylene blue dye. *Physics and Chemistry of the Earth, Parts A/B/C* **2020**, *118-119*, 102900.
- (S10) Peng, Z.; He, Z.; Li, L.; Xiong, L.; Fan, M. Photocatalytic degradation of methylene blue by efficient TiO<sub>2</sub>-partially reduced graphene oxide composites. *Applied Organometallic Chemistry* **2024**, *38*.
- (S11) Duran, F.; Diaz-Urbe, C.; Vallejo, W.; Muñoz-Acevedo, A.; Schott, E.; Zarate, X. Adsorption and Photocatalytic Degradation of Methylene Blue on TiO<sub>2</sub> Thin Films Impregnated with Anderson-Evans Al-Polyoxometalates: Experimental and DFT Study. *ACS Omega* **2023**, *8*, 27284–27292.
- (S12) Kurniawan, T. A.; Mengting, Z.; Fu, D.; Yeap, S. K.; Othman, M. H. D.; Avtar, R.; Ouyang, T. Functionalizing TiO<sub>2</sub> with graphene oxide for enhancing photocatalytic degradation of methylene blue (MB) in contaminated wastewater. *Journal of Environmental Management* **2020**, *270*, 110871.
- (S13) Komaraiah, D.; P.Madhukar; Vijayakumar, Y.; Ramana Reddy, M.; Sayanna, R. Photocatalytic degradation study of methylene blue by brookite TiO<sub>2</sub> thin film under visible light irradiation. *Materials Today: Proceedings* **2016**, *3*, 3770–3778.
- (S14) Liu, G.; Mamat, M.; Baikeli, Y.; Dong, X. Photocatalytic degradation of methylene blue by TiO<sub>2</sub>/Nd<sub>2</sub>O<sub>3</sub> composite thin films. *Heliyon* **2024**, *10*, e29894.
- (S15) Hamed, N. K. A.; Ahmad, M. K.; Hairom, N. H. H.; Faridah, A. B.; Mamat, M. H.; Mohamed, A.; Suriani, A. B.; Soon, C. F.; Fazli, F. I. M.; Mokhtar, S. M.; Shimomura, M. Photocatalytic degradation of methylene blue by flowerlike rutile-phase

TiO<sub>2</sub> film grown via hydrothermal method. *Journal of Sol-Gel Science and Technology*  
**2022**, *102*, 637–648.
